# Supplementary material for: Asymmetric and symmetric protein arginine methylation in methionine-addicted human cancer cells
Source: PubMed Central journal article supplement (PMC10745221; doi:10.1371/journal.pone.0296291), 2023-12-22

Figure S1 and Figure 2:

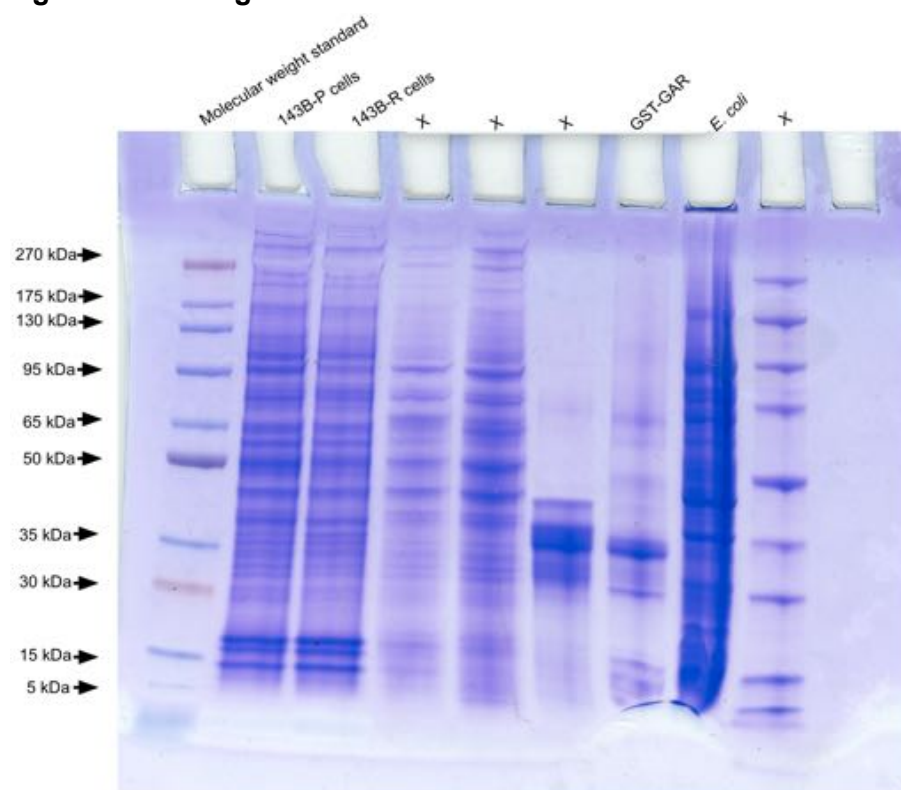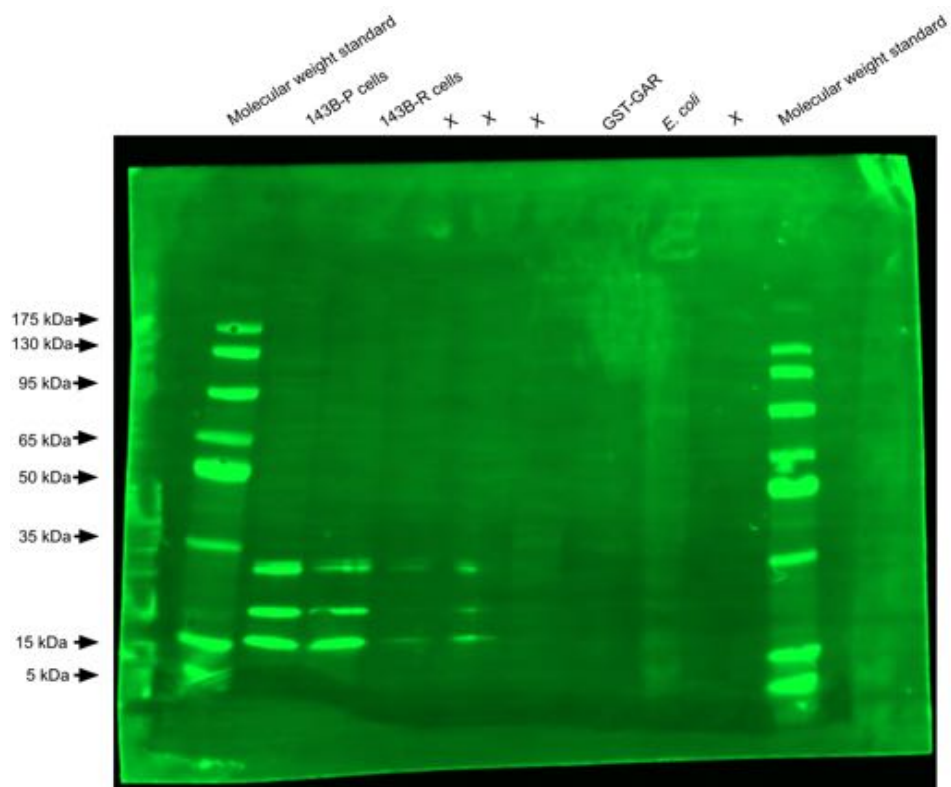

Figure 3:

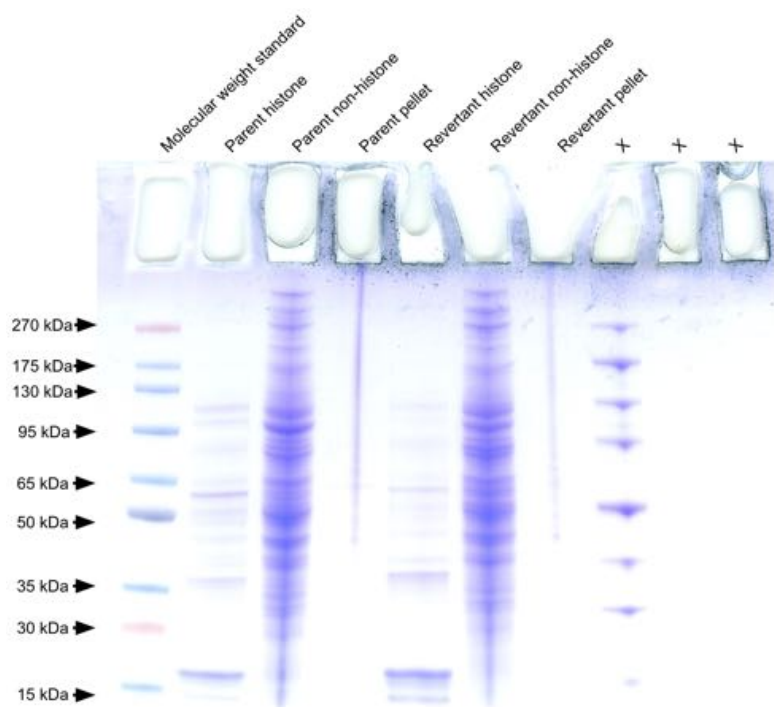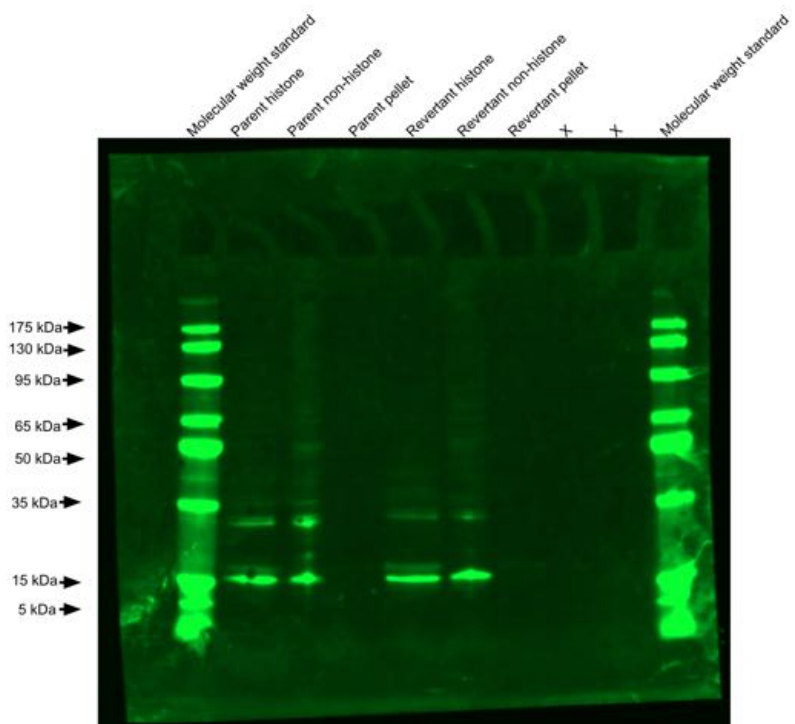

Figure S1 and Figure 4:

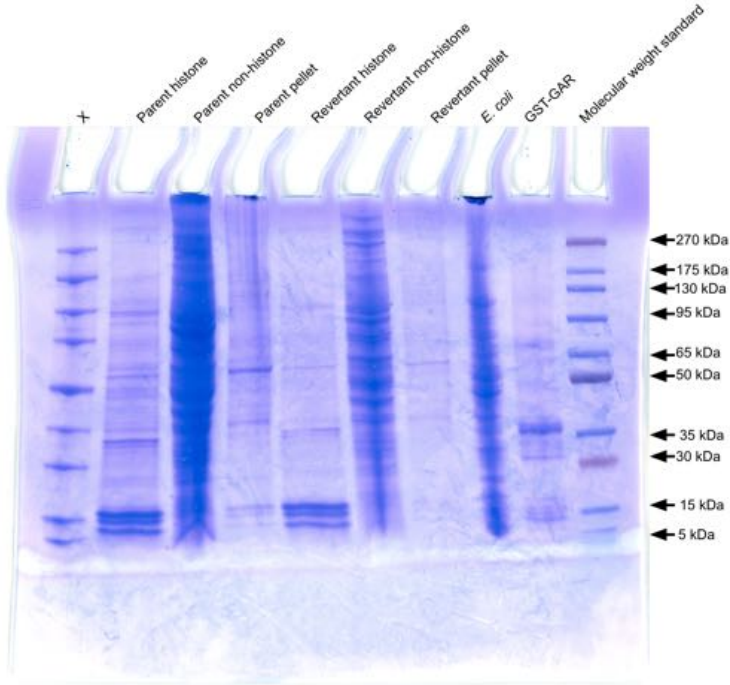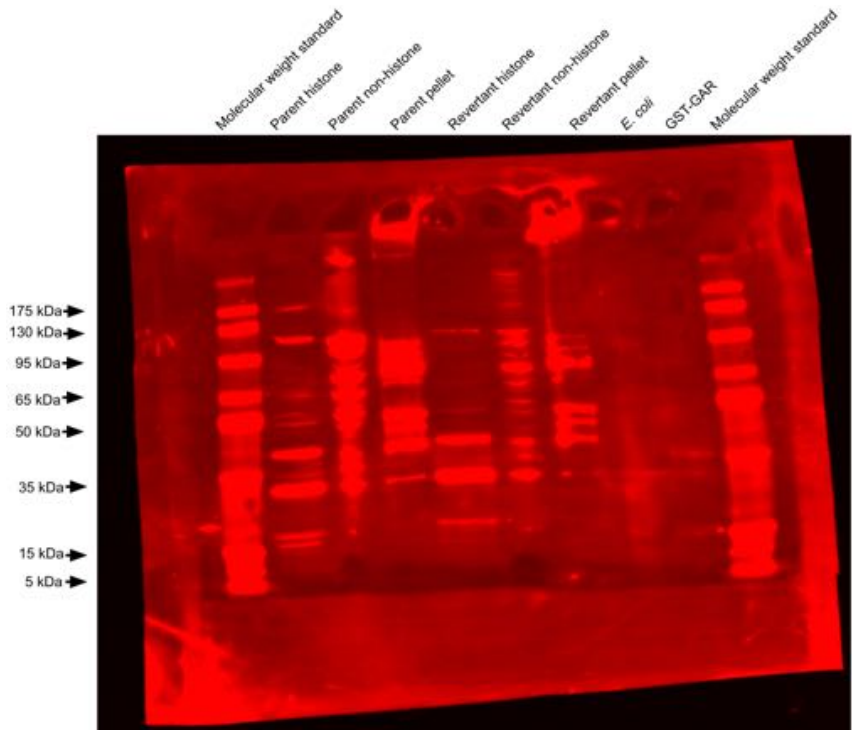

Figure 5:

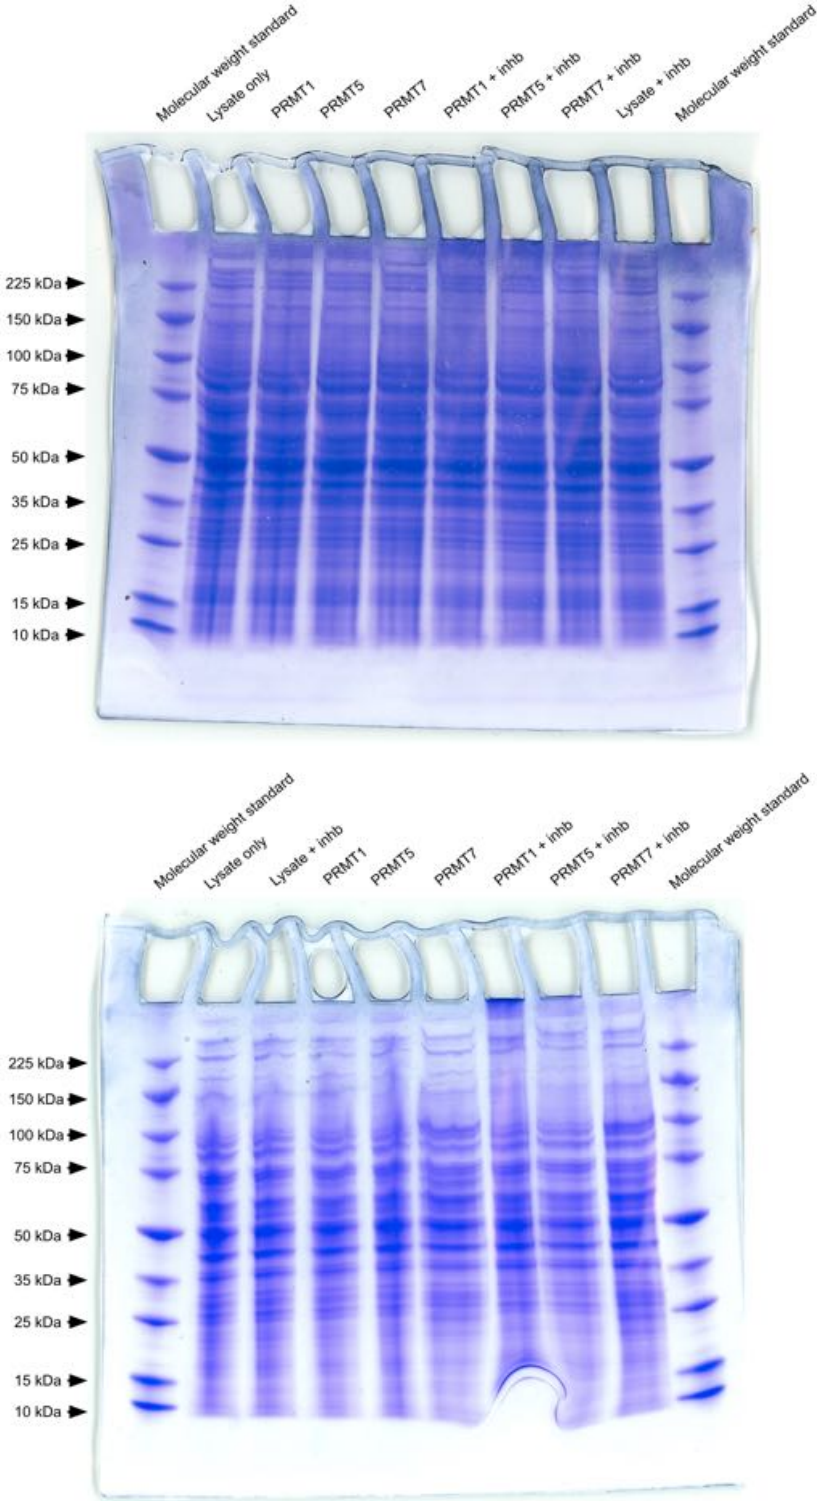



Figure 6:

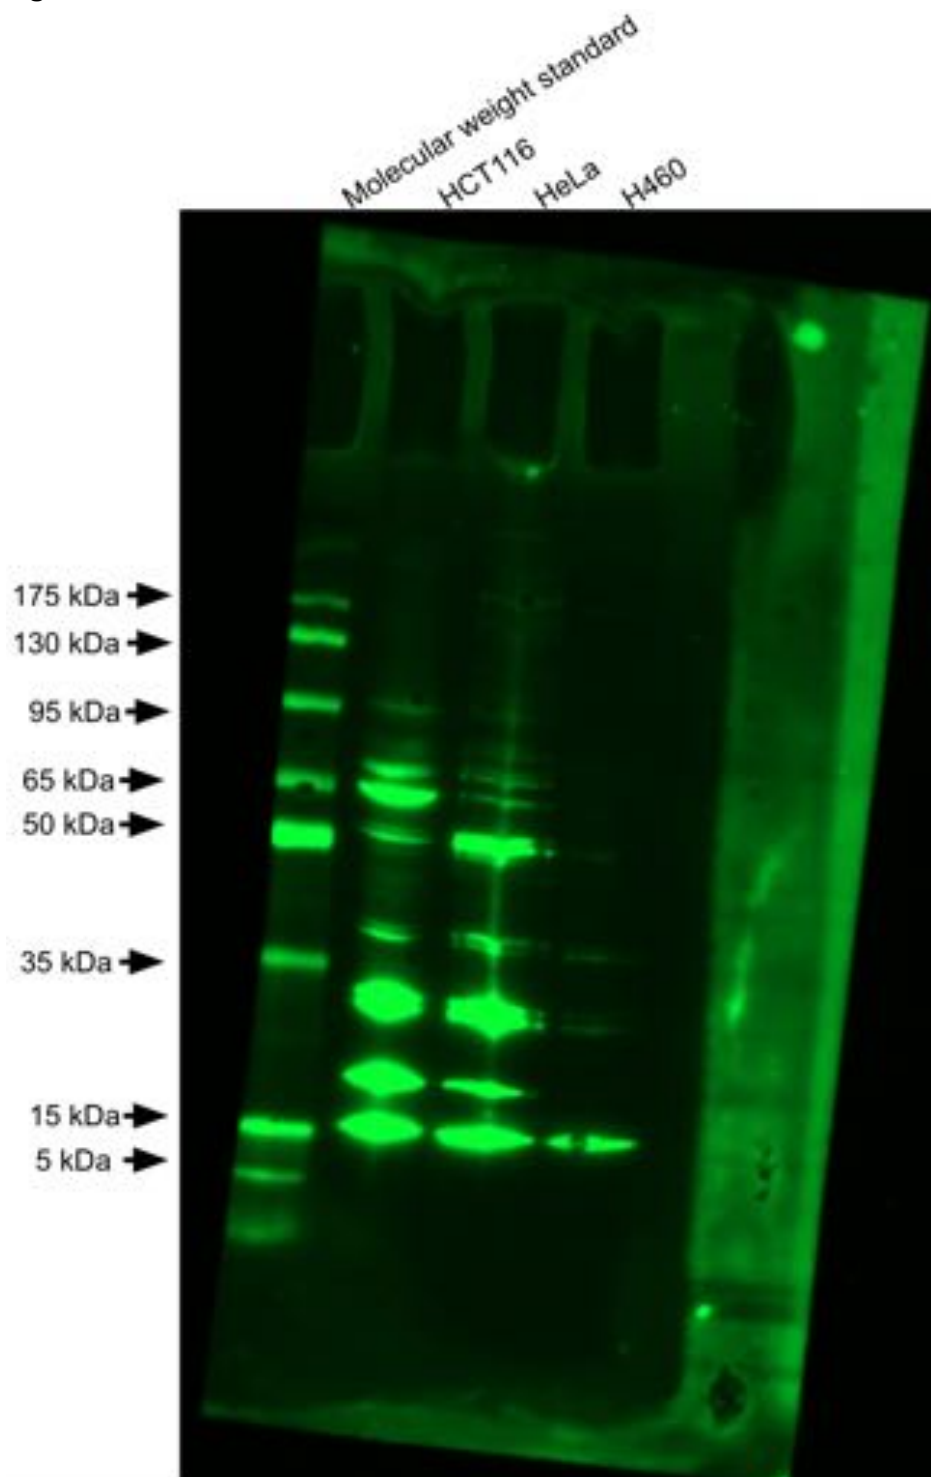

Molecular weight standard  
HCT116

HeLa

H460

Molecular weight standard

175 kDa →  
130 kDa →  
95 kDa →  
65 kDa →  
50 kDa →  
  
35 kDa →  
  
15 kDa →  
5 kDa →

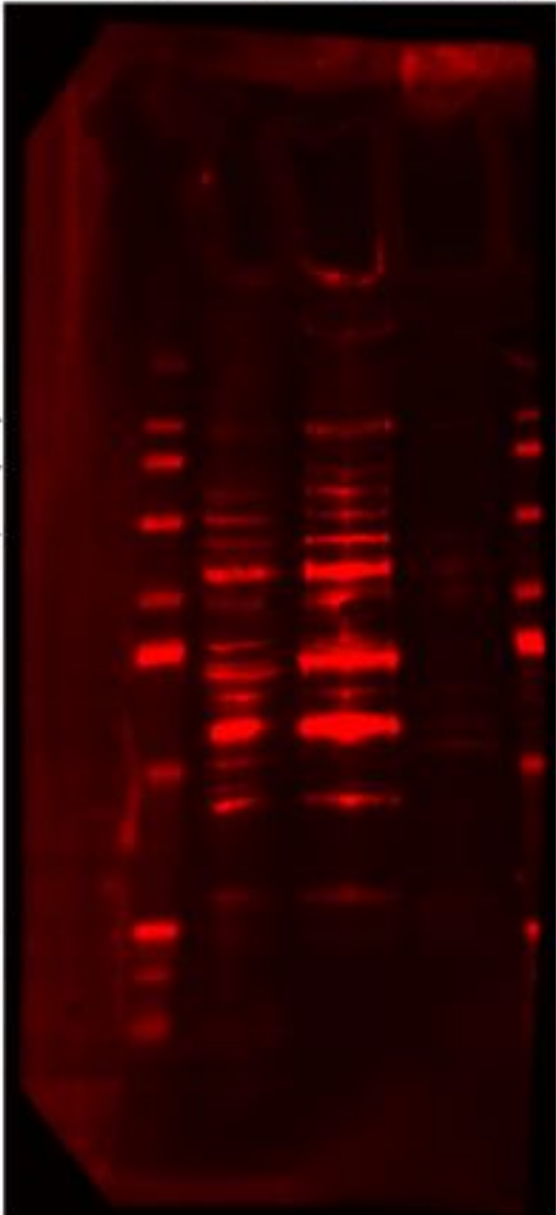

Figure 7:

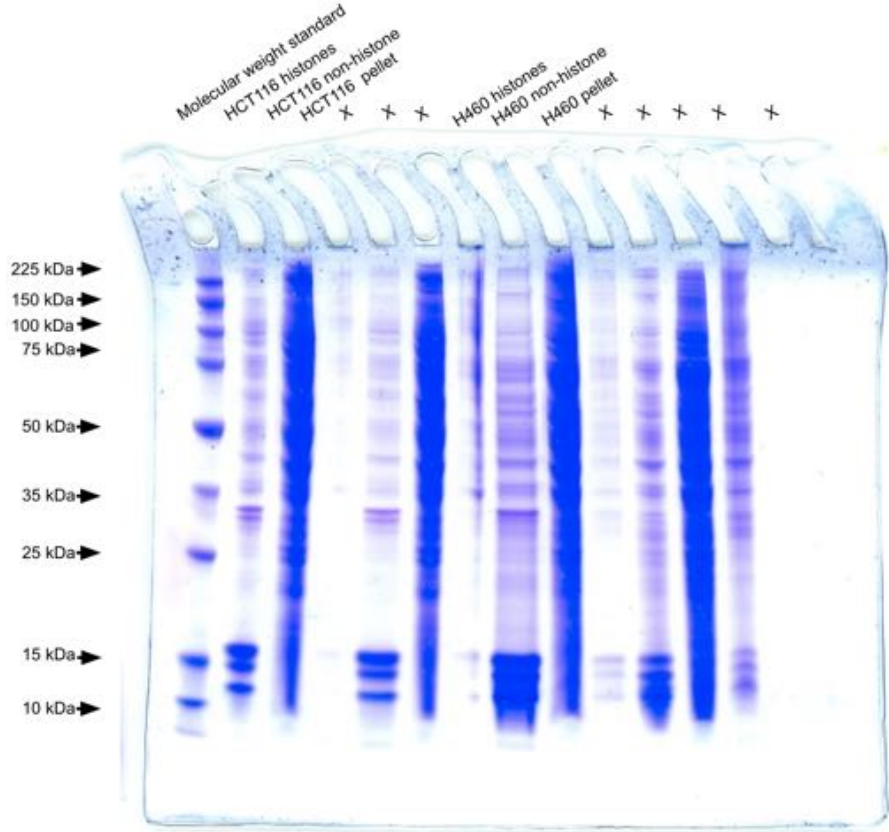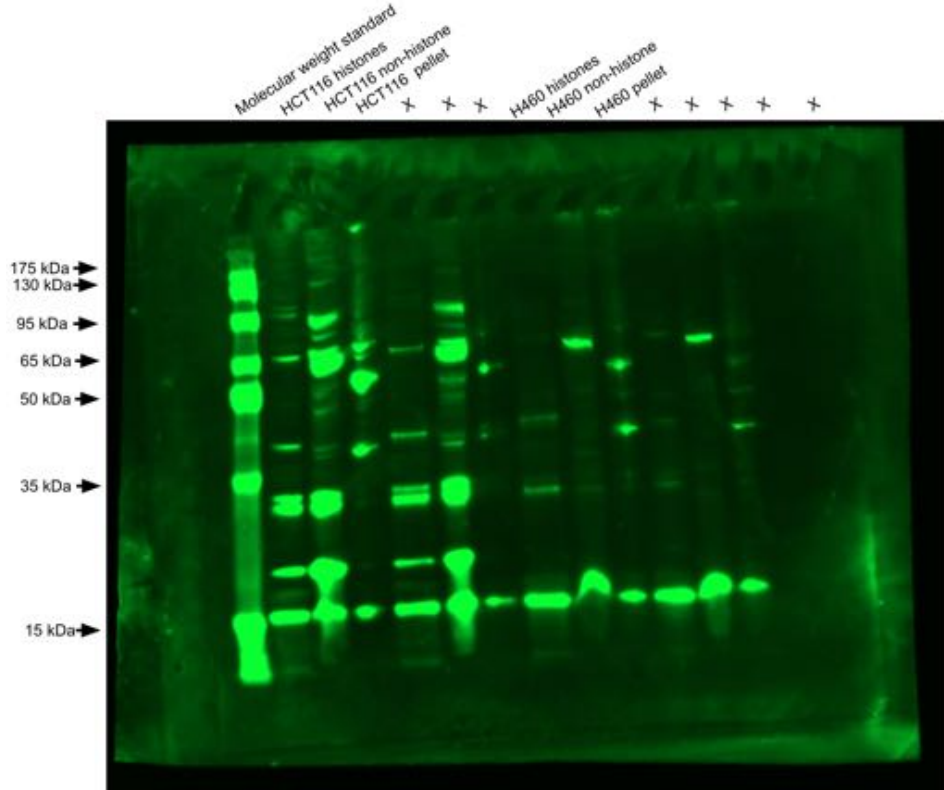



Figure 8:

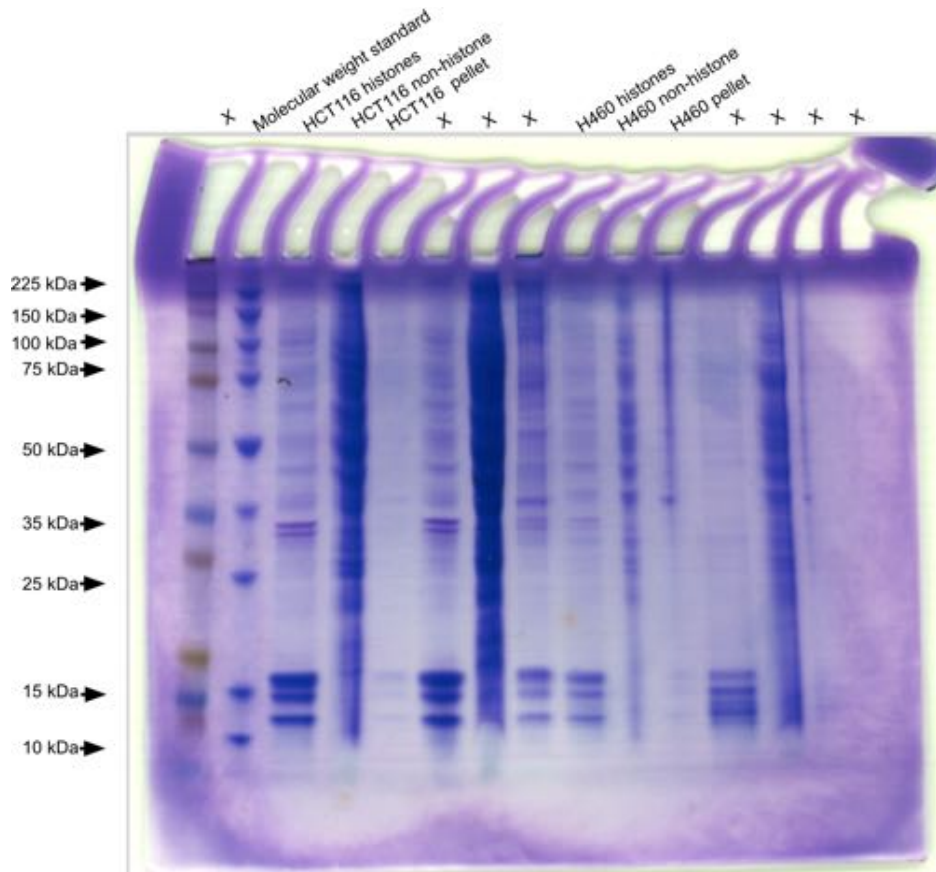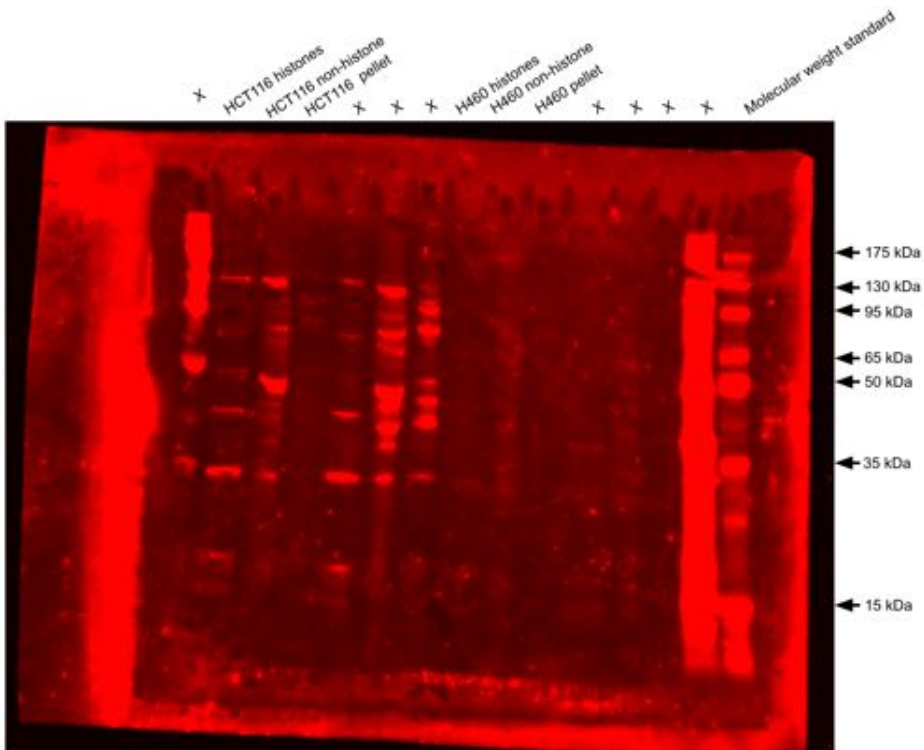

Figure S2:

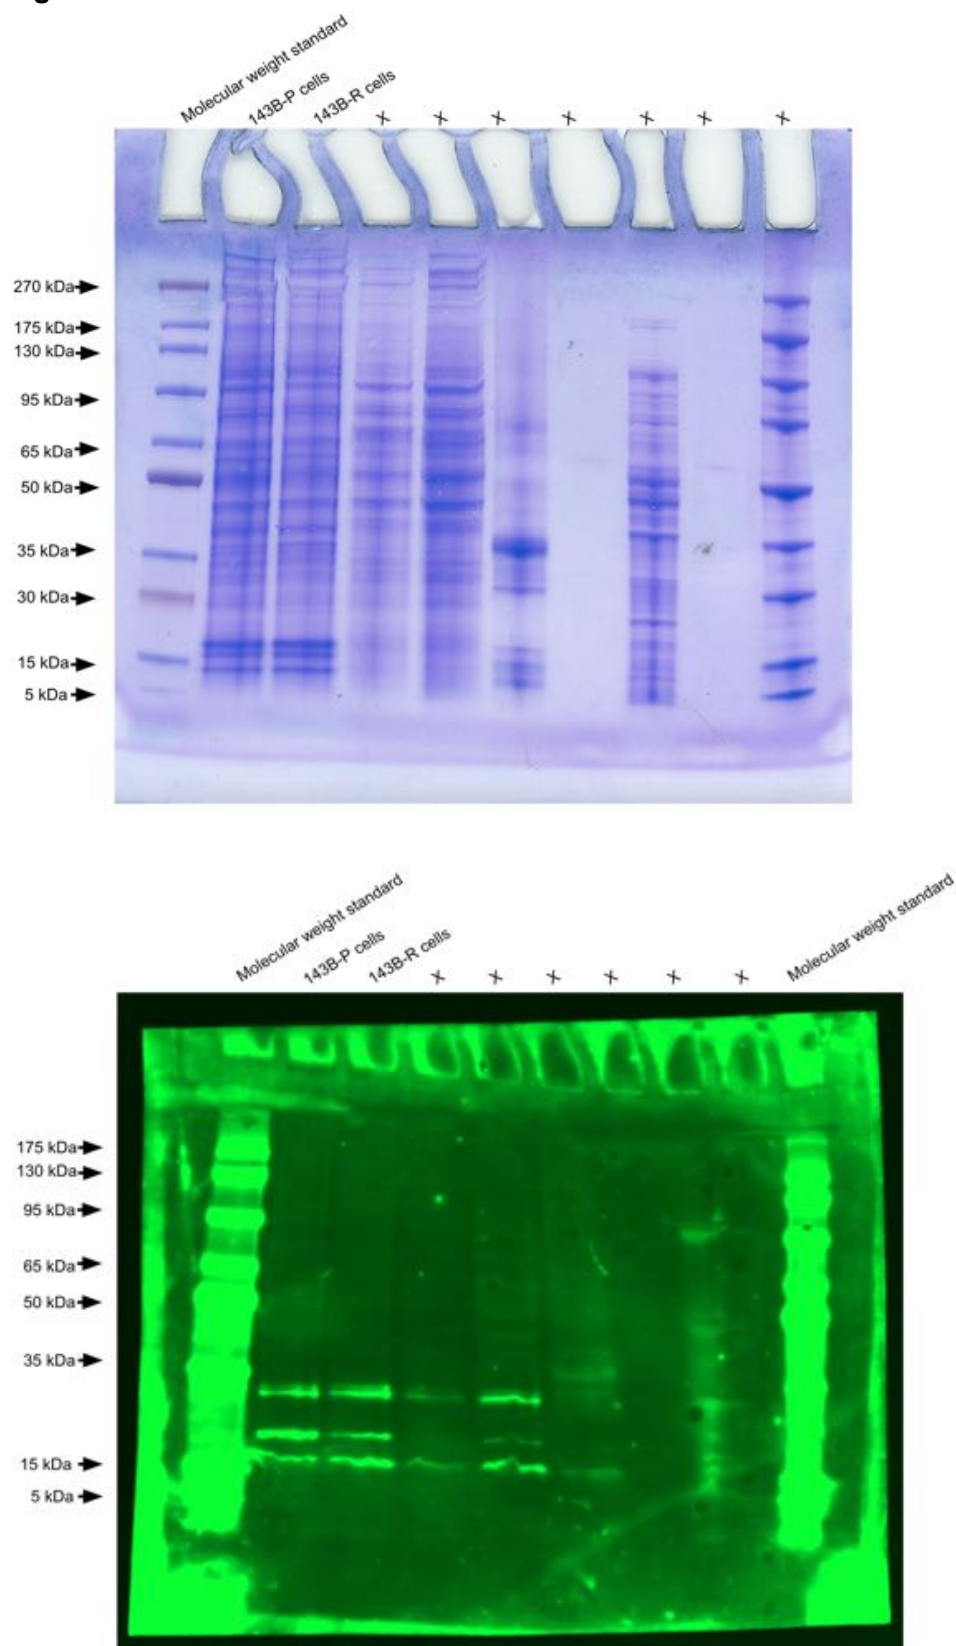

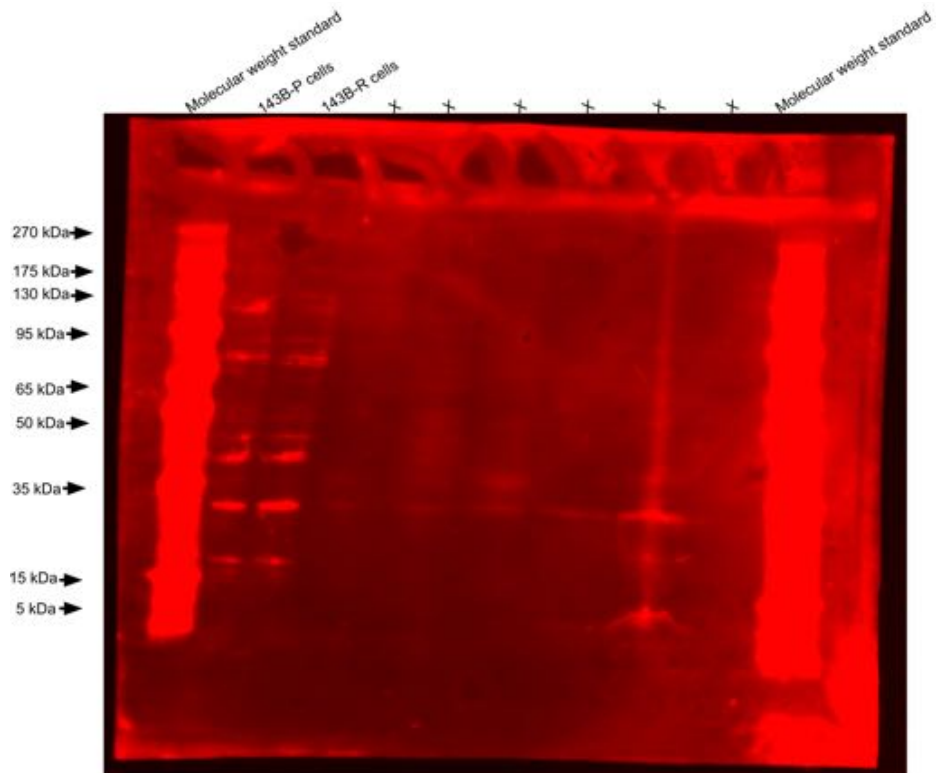

Figure S3:

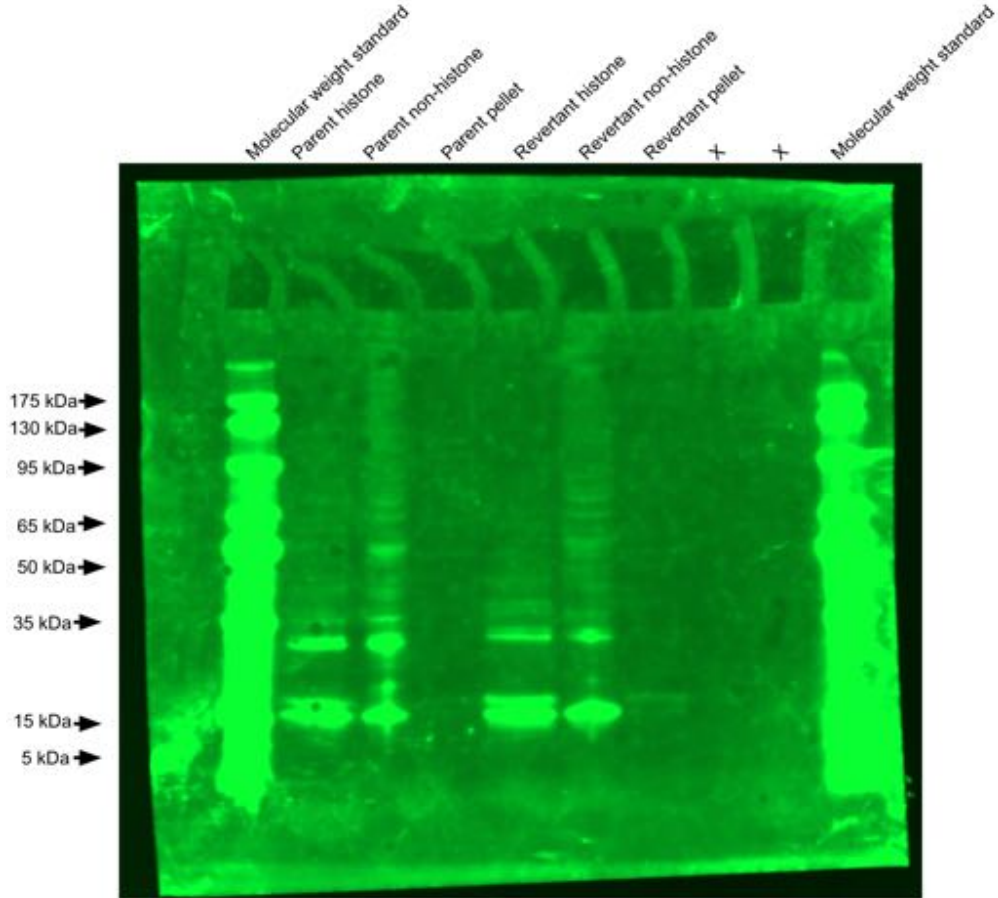

Figure S4:

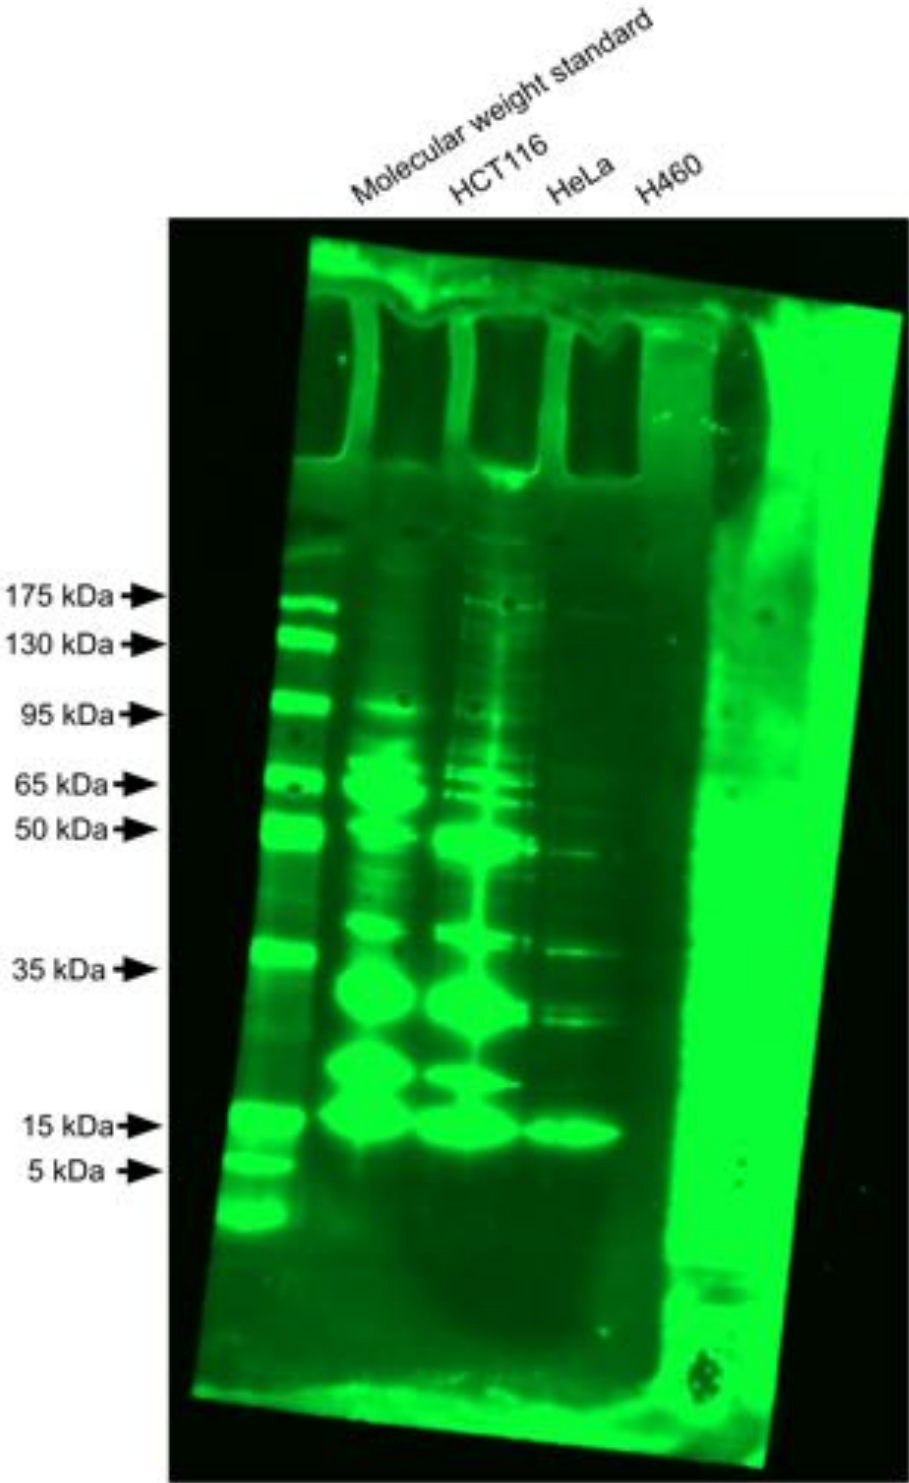

Molecular weight standard  
HCT116

HeLa

H460

Molecular weight standard

175 kDa →  
130 kDa →  
95 kDa →  
65 kDa →  
50 kDa →  
  
35 kDa →  
  
15 kDa →  
5 kDa →

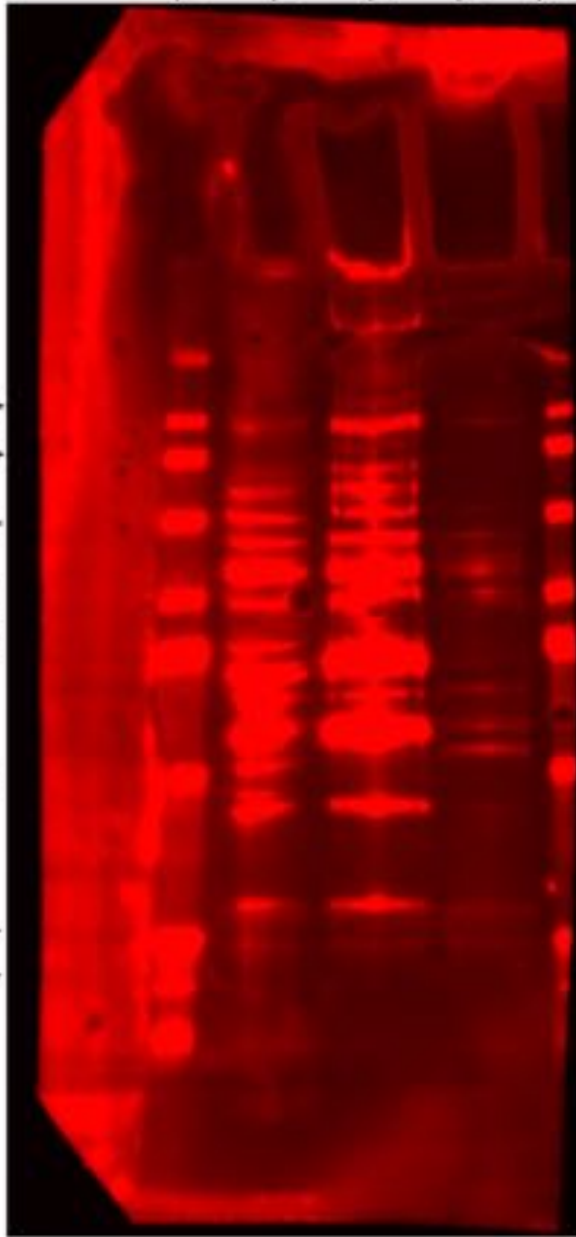

Figure S5:

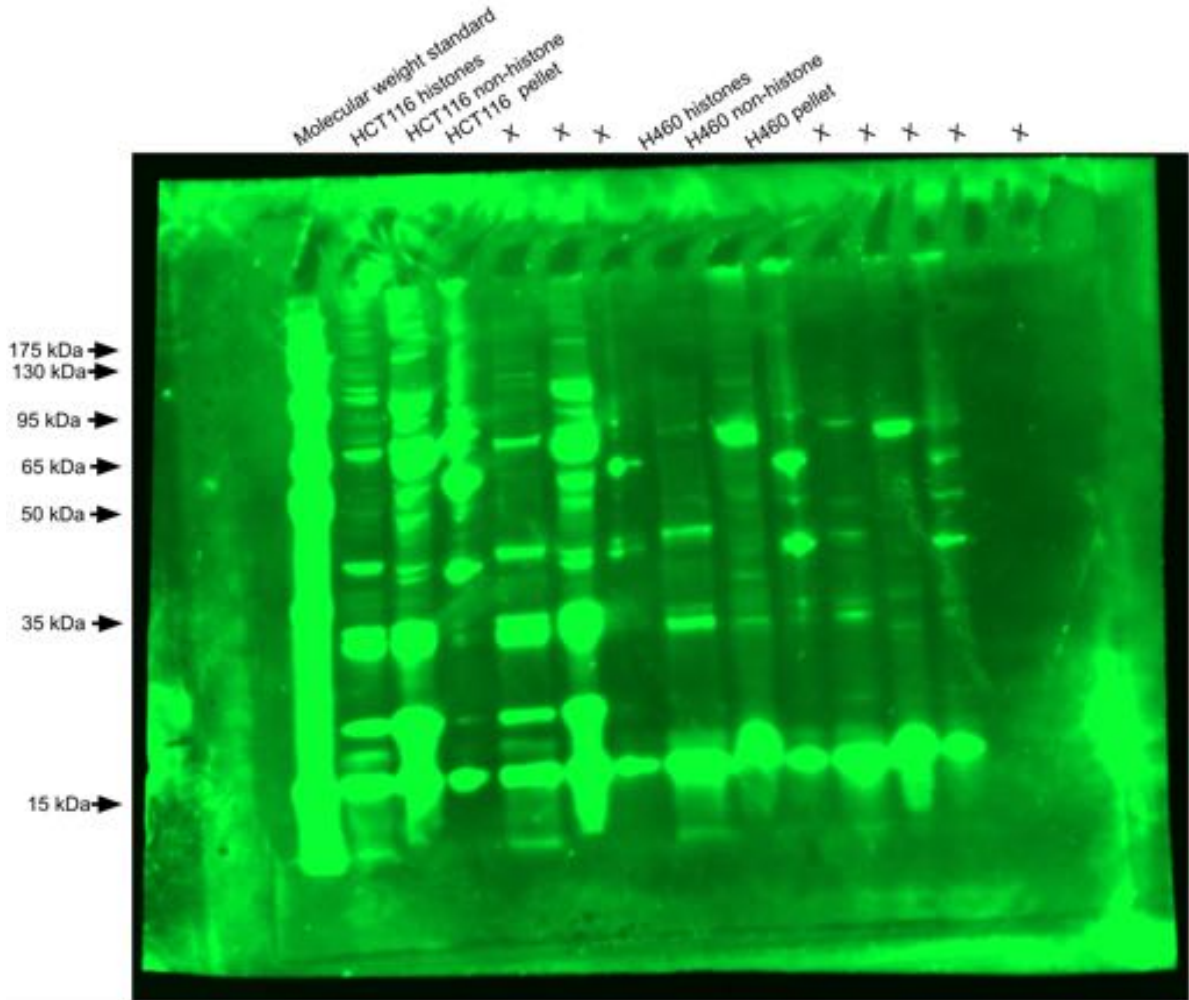

Supplement: pone.0296291.s006.pdf [file pone.0296291.s006.pdf]
